1 **ALLELOPATHY AS AN EVOLUTIONARILY STABLE STRATEGY**

2

3 **Rachel M. McCoy<sup>1,2</sup>, Joshua R. Widhalm<sup>1,2</sup>, and Gordon G. McNickle<sup>1,3,\*</sup>**

4

5 <sup>1</sup>Purdue Center for Plant Biology, Purdue University, West Lafayette, IN 47907, USA.

6

7 <sup>2</sup>Department of Horticulture and Landscape Architecture, Purdue University, 625 Agriculture Mall  
8 Drive, West Lafayette, IN 47907, USA.

9

10 <sup>3</sup>Department of Botany and Plant Pathology, Purdue University, 915 West State Street, West  
11 Lafayette, IN 47907, USA.

12

13 \*Correspondence: G.G. McNickle, Center for Plant Biology and Department of Botany and Plant  
14 Pathology, Purdue University, 915 West State Street, West Lafayette, IN 47907, USA.

15 ([gmcnickle@purdue.edu](mailto:gmcnickle@purdue.edu)) fax + 1 765 494 0363, tel. +1 765 494 4645

16

17 **Running title: Allelopathy as an evolutionarily stable strategy**

18

19 **ABSTRACT**

20 In plants, most competition is resource competition, where one plant simply pre-empts the  
21 resources away from its neighbours. Interference competition, as the name implies, is a form of  
22 direct interference to prevent resource access. Interference competition is common among  
23 animals who can physically fight, but in plants, one of the main mechanisms of interference  
24 competition is Allelopathy. allelopathic plants release of cytotoxic chemicals into the  
25 environment which can increase their ability to compete with surrounding organisms for limited  
26 resources. The circumstances and conditions favoring the development and maintenance of  
27 allelochemicals, however, is not well understood. Particularly, it seems strange that, despite the  
28 obvious benefits of allelopathy, it seems to have only rarely evolved. To gain insight into the  
29 cost and benefit of allelopathy, we have developed a  $2 \times 2$  matrix game to model the interaction  
30 between plants that produce allelochemicals and plants that do not. Production of an  
31 allelochemical introduces novel cost associated with synthesis and detoxifying a toxic chemical  
32 but may also convey a competitive advantage. A plant that does not produce an allelochemical  
33 will suffer the cost of encountering one. Our model predicts three cases in which the  
34 evolutionarily stable strategies are different. In the first, the non-allelopathic plant is a stronger  
35 competitor, and not producing allelochemicals is the evolutionarily stable strategy. In the  
36 second, the allelopathic plant is the better competitor and production of allelochemicals is the  
37 more beneficial strategy. In the last case, neither is the evolutionarily stable strategy. Instead,  
38 there are alternating stable states, depending on whether the allelopathic or non-allelopathic  
39 plant arrived first. The generated model reveals circumstances leading to the evolution of  
40 allelochemicals and sheds light on utilizing allelochemicals as part of weed management  
41 strategies. In particular, the wide region of alternative stable states in most parameterizations,  
42 combined with the fact that the absence of allelopathy is likely the ancestral state, provides an  
43 elegant answer to the question of why allelopathy rarely evolves despite its obvious benefits.  
44 Allelopathic plants can indeed outcompete non-allelopathic plants, but this benefit is simply not

45 great enough to allow them to go to fixation and spread through the population. Thus, most  
46 populations would remain purely non-allelopathic.

47

48 *Keywords: allelopathy; game theory; evolutionarily stable strategy; modeling*

49

## 50 **INTRODUCTION**

51 Competition is ubiquitous in the natural world, as there are finite resources available in a  
52 given time and space<sup>1-3</sup>. Thus, competition generally reduces plant fitness when resources, such  
53 as light, space, water and nutrients are limiting<sup>4,5</sup>. This type of competition for finite resources is  
54 broadly named resource competition and occurs when organisms compete by simply reducing  
55 the availability of resources to other organisms<sup>6</sup>. Alternatively, interference competition occurs  
56 when one organism interferes with, and therefore reduces, the ability of the other to obtain a  
57 shared resource while not necessarily drawing down resource concentrations<sup>6</sup>. Animals routinely  
58 face interference competition as they can physically fight over resources<sup>7</sup>. Sessile plants primarily  
59 compete via resource competition. However, one of the major mechanisms of interference  
60 competition in plants is mediated chemically through allelopathy<sup>8</sup>. For example, one of the best  
61 documented examples is allelopathy by walnut trees (*Juglans* spp.), mediated by the  
62 allelochemical juglone, which is toxic to a variety of crop and horticultural species, including corn  
63 and soybean<sup>12</sup> and tomato and cucumber<sup>13</sup>.

64

65 Allelopathy is the production of chemicals, called allelochemicals, that are released into  
66 the environment and negatively affect the growth and development of competing individuals<sup>9</sup>.  
67 Although the term was first used in 1937, the effect has been recognized for thousands of years<sup>9</sup>.  
68 Unfortunately, there have been difficulties in studying the competitive effects of allelopathy  
69 because of methodological difficulties. For example, for many years experiments used soil  
70 additives such as activated charcoal that were thought to prevent the activity of allelochemicals

71 with the goal of comparing how plants grew either with or without the presence of this form of  
72 interference competition. Unfortunately, it was later learned that activated charcoal also stimulates  
73 nutrient availability, and thus, many years of research showing the negative effects of  
74 allelochemicals were probably just detecting the positive effects of fertilization (e.g.<sup>10,11</sup>).

75

76 Despite limitations in the ability to experimentally study allelopathy, it has been implicated  
77 in the success of some invasive plants, highlighting the advantage of interference competition as  
78 a strategy<sup>14</sup>. Invasion by non-native species is ranked the second strongest risk to natural  
79 diversity<sup>15</sup>. For example, Paterson's curse (*Echium plantagineum* L.) is an invasive weed in  
80 Australia, affecting up to 30 Mha, whose invasion success is partially attributed to production of  
81 the allelochemical shikonin and its derivatives<sup>16</sup>. Indeed, one commonly invoked mechanism for  
82 invasion by non-native species is the novel weapons hypothesis, which suggests invasive species  
83 are successful through use of competitive strategies for which native species have not co-evolved  
84 counter strategies<sup>17,18</sup>. This mechanism has been linked to the invasion success of allelopathic  
85 Policeman's helmet (*Impatiens glandulifera*)<sup>19</sup>, which releases a compound structurally similar to  
86 shikonin called 2-methoxy-1,4-naphthoquinone (2-MNQ) that elicits negative effects on herb  
87 germination and mycelium growth and is otherwise absent in soils without *I. glandulifera*, thus  
88 suggesting 2-MNQ may function as a "novel weapon"<sup>19-21</sup>. From these studies, it may be possible  
89 that allelochemicals may have significant potential for genetically modified cropping systems to  
90 enhance the competitive ability of crop species over weeds.

91

92 Despite the potential advantages of allelochemicals as an evolved tool for interference  
93 competition, they seem to have only rarely evolved. Here, we report an evolutionary game  
94 theoretic model to probe the benefits and circumstances that might favor the evolution of  
95 allelochemicals to better understand why they might not be more common in plants. Specifically,  
96 we ask: 1) What circumstances favor the production of allelochemicals? 2) How does the cost of

97 producing an allelochemical affect fitness of the plant producing the allelochemical and plants  
98 competing with that plant? 3) When will allelopathic plants be stable in a population? Beyond the  
99 implications for evolutionary ecology, understanding the evolution of allelopathy has the potential  
100 to inform the design of applications for agriculture, from the integration of allelopathic crops into  
101 farming systems to the use of synthetic biology to create a crop that produces its own  
102 allelochemical-based weed control.

103

## 104 **MATERIALS AND METHODS**

105

### 106 *Model development*

107 We developed a  $2 \times 2$  matrix game of interactions among a plant player with (+A) and  
108 without (-A) allelopathy. We assumed that competition creates benefits of available resources  
109 (B), that the cost (C) to the player of producing allelochemicals is the sum of the costs of  
110 production of the allelochemical and detoxification to prevent autotoxicity, and that allelochemicals  
111 impose some different cost to the opponent in the form of toxicity and/or detoxification (T). We  
112 further assumed that benefits were shared unequally, encompassed by a parameter,  $a$ , that  
113 represents the proportion of benefits the allelopathic plant receives when competing with a non-  
114 allelopathic plant. These parameters of the model should adhere to the following:  $0 < B, C, T$  and  
115  $\frac{1}{2} < a \leq 1$ ,  $0 \leq p \leq 1$  where  $p$  is the proportion of allelopathic plants in the population. We found  
116 this four-parameter model to be the simplest possible model that generates the evolution of  
117 allelopathy in ways that seem true to nature, though we describe two possible simpler alternatives  
118 in the Supplementary Information that explore how the parameters  $a$  and  $T$  individually shape  
119 model solutions. We understand the limitations imposed by the simplicity of the model, but the  
120 four, simple parameters encompass complex, multifaceted biological possibilities, and the  
121 simplicity allows us to ask large-scale questions about the ecology and evolution of allelopathy.

122

123 Combining these parameters, we can derive the payoff,  $G_{v,u}$ , across several competitive  
124 contexts where  $v$  is the focal plant strategy (+ $A$  or  $-A$ ), and  $u$  is the neighboring plant strategy  
125 (+ $A$  or  $-A$ ). Finally, we also assume that there are two plants competing in something like a pot  
126 experiment, because we imagine this is the most likely way to empirically test our model in the  
127 future (e.g.<sup>10,11</sup>). However, the equations below can be extended to any number of competing  
128 plants by simply replacing 2 with  $N$ , where  $N$  is the number of competing plants.

129

130 First, when both plants produce allelochemicals, we argue that they will, on average, share  
131 the total benefit of the soil volume equally,  $\frac{B}{2}$ , but will also pay the cost of producing and detoxifying  
132 allelochemicals,  $C$ . Thus, the fitness pay-off to a plant in a population of pure + $A$  plants is:

133 
$$G_{+A,+A} = \frac{B}{2} - C \quad (\text{equation 1})$$

134

135 Second, in a mixed population of + $A$  and  $-A$  plants, the + $A$  plant will pay the cost  $C$  but  
136 will share the benefits  $B$  differently. Instead of equally sharing the benefits, the player will get a  
137 proportion of benefits,  $a$ , that takes into account the competitive advantage of production of  
138 allelochemicals according to:

139 
$$G_{+A,-A} = aB - C \quad (\text{equation 2})$$

140

141 Inversely, in the mixed population, the  $-A$  plant obtains the remaining benefit, represented by  $(1-$   
142  $a)B$ , and pays the cost of toxicity,  $T$ , according to:

143 
$$G_{-A,+A} = (1 - a)B - T \quad (\text{equation 3})$$

144

145 Finally, in a pure population of  $-A$  plants, because no plant produces allelochemicals, they merely  
146 share the benefits as  $\frac{B}{2}$  and have no costs associated with allelochemicals, according to:

147 
$$G_{-A,-A} = \frac{B}{2} \quad (\text{equation 4})$$

148

149 Combined, equations 1-4 yield the pay-off matrix shown as Figure 1.

150 *Evolutionarily stable strategy definition*

151 In a matrix game, an evolutionarily stable strategy (ESS) is identical to a Nash equilibrium  
152 where a participant cannot gain by changing strategy if the other participant's strategy does not  
153 change<sup>22,23</sup>. Thus, a pure ESS is defined as the strategy which once adopted by members of a  
154 population cannot be invaded by any alternative strategy. Mixed ESSs are also permissible where  
155 multiple strategies either ecologically coexist through evolutionary time or form non-coexisting  
156 alternative stable states (sometimes also called priority effects). Here, in a  $2 \times 2$  matrix game, if  
157  $G_{v,u}$  is the fitness payoff of a focal plant species using strategy 'v' against a competing plant  
158 species using strategy 'u' such that  $v \neq u$ , then v is a pure ESS if and only if:  $G_{v,v} > G_{u,v}$  and  
159  $G_{v,u} > G_{u,u}$ . Alternatively, u is a pure ESS when  $G_{u,v} > G_{v,v}$  and  $G_{u,u} > G_{v,u}$  (i.e. under the opposite  
160 inequalities). Most interestingly, under this definition mixed ESS solutions are possible where the  
161 two strategies may coexist or for a system of alternative stable states<sup>24</sup>. A mixed ESS occurs  
162 when:  $G_{u,v} > G_{v,v}$  and  $G_{v,u} > G_{u,u}$ . Alternative stable states occur when:  $G_{v,v} > G_{u,v}$  and  $G_{u,u} >$   
163  $G_{v,u}$ . Together, a keen observer will note that these four inequalities form all possible pairs of  
164 inequalities within each column of a  $2 \times 2$  payoff matrix as drawn here (Figure 1).

165

166 **RESULTS**

167

168 *Pure evolutionarily stable strategies*

169 For +A to be a pure ESS, +A needs to be able to (i) invade a population of -A and (ii)  
170 resist invasion from -A. According to the ESS definition, this occurs when:

171 
$$aB - C > \frac{B}{2} \text{ and } \frac{B}{2} - C > B(1 - a) - T \quad (\text{equations 5a})$$

172

173 Equations 5a can be rearranged into isoclines in  $B$  and  $C$  space to find:

174 
$$B > \frac{2C}{2a-1} \text{ and } B > \frac{2(C-T)}{2a-1} \quad (\text{equations 5b})$$

175

176 Alternatively, for  $-A$  to be ESS,  $-A$  needs to be able to (i) invade a population of  $+A$  and (ii) resist  
177 invasion from  $+A$ .

178 
$$\frac{B}{2} > aB - C \text{ and } (1 - a)B - T > \frac{B}{2} - C \quad (\text{equations 6a})$$

179

180 Equations 6a can be rearranged to find:

181 
$$B < \frac{2C}{2a-1} \text{ and } B < \frac{2(C-T)}{2a-1} \quad (\text{equations 6b})$$

182

183 Notice that equations 5 and 6 are simply opposite inequalities.

184

### 185 *Mixed evolutionarily stable strategies*

186 The mixed strategy, where there are alternating stable states such that either  $-A$  or  $+A$   
187 can resist invasion from the other strategy occurs when,

188 
$$\frac{B}{2} < aB - C \text{ and } (1 - a)B - T > \frac{B}{2} - C \quad (\text{equations 7a})$$

189

190 Equations 7a can be rearranged to find:

191 
$$B < \frac{2C}{2a-1} \text{ and } B > \frac{2(C-T)}{2a-1} \quad (\text{equations 7b})$$

192

193 The isoclines in equations 5-7 create two parallel lines, each with slope  $\frac{2}{2a-1}$ , but that either

194 intercept the y-axis at 0 or at  $\frac{-2T}{2a-1}$ . Thus, depending on the values of  $a$  and  $T$ , we can plot the

195 entire solution space graphically in positive  $B$  and  $C$  phase space (Figure 2). For  $+A$  to be the



196 ESS, the parameters need to be above both isoclines. For  $-A$  to be the ESS, the parameters  
197 need to be below both isoclines. Between the two lines, which will never cross as they have the  
198 same slope, there is a region of alternative stable states, also sometimes called a priority effect.  
199 In the region of alternative stable states, either strategy might occur, but the answer depends on  
200 the history of the system. That is, whichever strategy was there first becomes the ESS>

201

202 In our model, coexistence is never possible. For it to be so, would require:

203 
$$\frac{2C}{2a-1} < B < \frac{2(C-T)}{2a-1}. \quad (\text{equation 8})$$

204

205 Because  $T > 0$  by definition, these conditions can never be met. This suggests that within a  
206 population, all plants of a species will either produce or not produce allelochemicals.

207

208 Allelopathic plants gain a competitive advantage only when  $B > \frac{2C}{2a-1}$  which can offset the  
209 cost of producing allelochemicals beyond just the cost of toxicity on the neighboring plant (Figure  
210 2). However, if  $B < \frac{2(C-T)}{2a-1}$  then non-allelopathic  $-A$  plants gain the competitive advantage  
211 because the benefits of allelopathy do not outweigh the costs to the allelopathic plant, or the  
212 allelopathic chemical is simply not toxic enough to generate a benefit (*i.e.* low  $T$ ). This region of  
213 pure  $+A$  as the ESS expands as  $a$  increases (Figure 2). When  $a > 0.5$ , but  $\frac{2(C-T)}{2a-1} < B < \frac{2C}{2a-1}$ ,  
214 there is an interesting region between the two isoclines of alternative stable states where only  
215 one strategy can exist at a time, but which one occurs depends on the initial conditions (*i.e.* on  
216 this history of colonization and/or mutation). This area of alternative stable states also expands  
217 with increasing  $T$  but decreasing  $a$ .

218

219 **DISCUSSION**

220           In this study, we developed and analyzed a model of the evolution of allelopathy between  
221 two competing plants as an evolutionary game to examine the conditions under which the  
222 production and deployment of allelochemicals becomes a favorable competitive strategy. The  
223 model has four simple parameters that describe costs and benefits among players. Somewhat  
224 intuitively, allelopathy can only evolve when the benefits to the allelopathic plant outweigh the  
225 costs, but the model outlines these precise conditions in 4-dimensional phase space (Figure 2).  
226 For example, in the case of an extremely toxic allelochemical (*i.e.* large  $T$ ) that also happens to  
227 be metabolically costly to produce (*i.e.* large  $C$ ), the model makes it clear that there must be  
228 relatively high benefits (*e.g.* high  $B$ , very fertile environments) and confer a very large competitive  
229 advantage (large  $a$ ). Indeed, except where  $a$  approaches 1 and  $T$  is large, we see large regions  
230 of alternative stable states, and relatively small regions where  $+A$  is the pure ESS. Assuming  
231 that  $-A$  is the ancestral condition, we argue that this might explain why allelopathy has been  
232 relatively rare to evolve, despite the obvious advantage. That is, in the region of alternative stable  
233 states, any  $+A$  mutants would simply not be able to invade the ancestral  $-A$  population because  
234 of their priority effect advantage. The relative rarity of allelopathy in nature might indicate natural  
235 environments found on this planet exist closer to the upper left region of Figure 2, though future  
236 work should investigate whether the biochemical cost of production and the cost of detoxification  
237 are substantial energetic costs to plants to narrow down the region of parameter space that exists  
238 in natural plant communities. There may be some biochemical constraints that place the plant  
239 kingdom in this part of the phase space, and this would be an important area for plant biologists  
240 to explore further. It is also possible that allelopathy is more common than current knowledge  
241 suggests.

242

243           One way of reducing the cost of producing novel allelochemicals,  $C$ , is to harness existing  
244 metabolic frameworks. Many species producing naphthoquinone-based compounds, for example,

245 have independently evolved to do so from 1,4-dihydroxy-2-naphthoic acid (DHNA), an  
246 intermediate of the phyloquinone (vitamin K<sub>1</sub>) pathway<sup>32,33</sup>. Examples include juglone in black  
247 walnut trees<sup>34</sup>, lawsone and 2-MNQ in the Balsaminaceae (*e.g. Impatiens* species)<sup>35</sup>, lawsone  
248 and lapachol in the Bignoniaceae<sup>36</sup>, anthraquinones like alizarin made by Rubiaceae species<sup>37</sup>,  
249 and anthrasesamones produced by sesame (*Sesamum indicum*, Pedaliaceae)<sup>38</sup>. Interestingly,  
250 juglone, lawsone, and 2-MNQ are all implicated as allelochemicals<sup>19,39,40</sup>. This indicates that  
251 DHNA derived from the phyloquinone pathway, which is present in all plants, likely provides a  
252 lower cost path for plants to synthesize allelochemicals.

253

254 Over time, the cost of allelochemical toxicity,  $T$ , to  $-A$  plants could be mitigated by  
255 evolution of mechanisms to tolerate or detoxify the allelochemical. Therefore, the competitive  
256 disadvantage of not producing the allelochemical to  $-A$  plants would dissipate; however, the cost  
257 of detoxification, which is also part of  $T$ , would likely remain non-zero. We hypothesize that the  
258 evolution of  $T$  can draw inferences from evolution of herbicide resistances in plants, which occur  
259 via mutations in herbicide target sites (target-site resistance) or non-target sites (non-target-site  
260 resistance)<sup>41</sup>. In an analogous scenario of non-target-site resistance, the allelochemical itself or  
261 the toxicity arising from the allelochemical could be metabolically counteracted through  
262 biochemical modification and/or compartmentalization of the allelochemical or its modified  
263 product. Thus, non-target-site resistance is referred to as “metabolism-based resistance”<sup>42</sup>.  
264 Metabolism-based resistance to herbicides is primarily achieved via four gene families:  
265 cytochrome P450 monooxygenases, glutathione transferases (GSTs), glycosyltransferases,  
266 and/or ABC transporters<sup>43</sup>. It is likely that plants that evolve in proximity to an allelopathic plant  
267 use similar methods to tolerate allelochemicals. GSTs function by covalently linking glutathione  
268 (GSH) with compounds that are hydrophobic and electrophilic<sup>44</sup>; some also function as carriers  
269 that transport GSH-conjugates to vacuoles for detoxification<sup>45</sup>. Black-grass (*Alopercurus*  
270 *myosuroides*) is a weed species that has evolved resistance to multiple herbicides by over

271 expressing a single GST, AmGSTF1. Heterologous overexpression AmGSTF1 in *Arabidopsis*  
272 *thaliana* was shown to be sufficient to confer resistance to multiple herbicides<sup>46</sup>. Moreover,  
273 *Arabidopsis* seedlings grown *in vitro* in the presence of GSH in juglone-containing media were  
274 found to display root growth phenotypes indistinguishable from wild type (Meyer et al 2020).  
275 Beyond conjugation with GSH, glycosylation appears to be a major mechanism of detoxification  
276 of specialized metabolites<sup>47</sup>. Indeed, much of the juglone found in black walnut is glycosylated<sup>48</sup>,  
277 suggesting that one of the mechanisms black walnut uses to tolerate producing and storing an  
278 autotoxic compound is through glycosylation. Reduced uptake or increased export could also  
279 confer some tolerance to allelopathic exposure. Mutations in transport proteins have been shown  
280 to confer resistance to herbicides through decreased uptake (reviewed in<sup>49</sup>). Additionally, fungi  
281 and bacteria have been shown to be able to degrade structurally diverse, toxic chemicals from a  
282 variety of plant families<sup>50-52</sup>. Studies from microorganisms may provide more insight into  
283 mechanisms plants use to tolerate allelochemicals or provide guidance for transgenic strategies  
284 to convey resistance to allelochemicals.

285

### 286 *Model assumptions and caveats*

287 As ever, any model comes with some caveats. One big one, is that factors which are not  
288 included in our model can affect Allelopathy. For example, in natural environments, allelopathy is  
289 affected by the ecology of the soil<sup>25</sup>. *Pseudomonas* J1, a soil bacteria isolated from soil  
290 surrounding a black walnut, is capable of growing on juglone as its sole carbon source<sup>26</sup>. Further,  
291 ailanthanone from *Ailanthus altissima* is more effective at suppressing growth of radish in sterile  
292 soil<sup>27</sup>. These and other studies show that degradation of allelochemicals by soil microbes is a  
293 factor in the toxicity of an allelochemical in a given environment. Such degradation would lead to  
294 a decrease in  $T$ , indicating that the parameter  $T$  for the same compound could be different in  
295 different soils and ecosystems. Similarly, the soil microbiome has been shown to have diverse

296 effects on plant fitness (reviewed in<sup>28</sup>). In addition to directly harming nearby plants, allelopathy  
297 may also play a role in altering the microbial soil community to the benefit of the allelopathic plant.  
298

299 Another example of a factor absent from our model is how Allelopathy interacts with other  
300 plant interactions. For example, invasive garlic mustard has been shown to inhibit the interaction  
301 between seedlings of competitors and their mutualistic fungi<sup>29</sup>. Similarly, *I. glandulifera* invasion  
302 disrupts symbiotic associations between arbuscular mycorrhiza and native saplings<sup>20</sup>, likely via  
303 the release of 2-MNQ, which was also shown to inhibit mycelium growth of ectomycorrhiza fungi<sup>19</sup>.  
304 Conversely, some studies have suggested that the plant microbiome reduces the effect of  
305 allelochemicals on the plant<sup>30</sup>, in effect lowering the cost of toxicity/detoxification,  $T$ , to opponents.  
306 *Paxillus involutus*, a mycorrhizal fungi of black spruce (*Picea mariana*), has been shown to be  
307 able to degrade allelopathic compounds produced by *Kalmia angustifolia*, perhaps conveying  
308 some tolerance to black spruce<sup>31</sup>. These examples demonstrate the complexity of studying  
309 allelopathy in field conditions that our model does not capture.

310

### 311 *Implications and applications of the model*

312 Investigating the means by which plants reduce cost and increase fitness in the presence  
313 of allelochemicals will allow more predictable integration of allelopathy as part of weed  
314 management strategies in cropping systems. For example, intercropping is a common agricultural  
315 practice used in many parts of the world to improve land use efficiency, to mitigate the risk of a  
316 single crop failing, and to diversify farming income. Often, intercropping involves co-cultivation of  
317 two or more cash crops, but in some cases a cash crop is grown alongside a non-cash crop to  
318 provide benefits, such as weed suppression, to the primary crop<sup>53</sup>. In either case, intercropped  
319 species are grown in close enough proximity to allow biological interaction. Therefore, the  
320 allelopathic potential of each species should be considered when designing mixed cropping  
321 systems<sup>54</sup>. For example, a study by Iqbal *et al.*<sup>55</sup> showed that intercropping cotton (*Gossypium*

322 *hirsutum* L., cv FH901) with allelopathic crops, including sorghum (*Sorghum bicolor* L.), soybean  
323 (*Glycine max* L.), or sesame (*Sesamum indicum* L.), was an effective strategy to control purple  
324 nutsedge (*Cyperus rotundus* L.), a common aggressive weed found in parts of South Asia.  
325 According to the matrix game presented here, the fitness pay-off to both cotton and purple  
326 nutsedge (the  $-A$  species) would be expected to decrease as the toxicity,  $T$ , of allelochemicals  
327 produced by sorghum, soybean, or sesame (the  $+A$  species) increased. Indeed, seed cotton yield  
328 was found to decrease between 8-23% in all intercropping systems, compared to unmanaged  
329 cotton alone. Similarly, the presence of allelopathic species led to 70-96% reduced purple  
330 nutsedge density<sup>55</sup>. That control of purple nutsedge was found to be more effective in the second  
331 year of the study compared to the first year, which was suggested to be the result of residual  
332 allelochemicals leftover in the soil in year two<sup>55</sup>. This is consistent with purple nutsedge paying an  
333 increased penalty,  $T$ , to detoxify higher levels of allelochemicals.

334

335         Herbicide applications have increased over the last 25 years in many major cropping  
336 systems<sup>56</sup>. With this trend, so too has the number of weeds that have developed resistance to  
337 commonly used pesticides<sup>57</sup>. To address the lack of new herbicidal modes of action needed to  
338 combat resistant weeds<sup>58</sup>, allelochemicals, which offer a wide diversity of new chemical  
339 structures, have been suggested as sources for developing novel herbicides<sup>59</sup>. One attractive  
340 strategy is to engineer or breed production of allelochemicals into non-allelopathic cash crops,  
341 although autotoxicity and the metabolic cost of biosynthesis must remain low enough to not  
342 significantly impact agricultural performance<sup>60</sup>. If the cost,  $C$ , to the crop engineered to be  $+A$  is  
343 too high then it would not be an ESS and could be invaded by  $-A$  species (*i.e.* weeds) (equations  
344 5a and 5b). At the same time, if the cost,  $C$ , to the  $+A$  crop is too low then it may allow it to become  
345 too easily capable of escaping and invading native populations of  $-A$  species (Figure 2). If the  
346 crop were engineered to produce and detoxify an allelochemical such that it was in the realm of

347 alternative stable states, the allelopathic crop would be able to resist invasion from  $-A$  weeds,  
348 without the possibility of escape and invasion. Conversely, by purposefully engineering a less fit  
349 crop to fall *outside* the region where  $+A$  is ESS (Figure 2), it would also provide a mechanism by  
350 which to prevent escape of the transgenic species. Such application could be useful in cover  
351 cropping where certain cover crops that not controlled prior to planting cash crops can become  
352 weeds.

353

354 Finally, another interesting consideration in the evolution of allelopathy is the presence of  
355 allelobiosis. Allelobiosis is a relatively new term that describes communication between plants via  
356 non-toxic compounds<sup>61</sup>. For example, planting tomato (*Lycopersicon esculentum*) in proximity  
357 with sagebrush (*Artemisia tridentata*) resulted in increased production of proteinase inhibitors in  
358 tomato due to methyl jasmonate released by the sagebrush<sup>62</sup>. Though allelobiosis has been most  
359 often demonstrated with volatile compounds, there are examples of this kind of plant-plant  
360 communication through the rhizosphere. Indeed, Li *et al.* (2016) found that allelobiosis and  
361 allelopathy coexist in interactions of weeds with allelopathic wheat. Root exudates from weed  
362 species were sufficient to induce allelopathy in the wheat, suggesting a chemical signal sensed  
363 by the wheat. Further work is necessary to detangle the effects of allelobiosis and allelopathy,  
364 especially in the case of inducible production of allelochemicals. As more information arises,  
365 allelobiosis could be an important factor to include in future efforts to expand the modeling of  
366 Allelopathy as an ESS>

367

### 368 *Conclusion*

369 Our model predicts three ESS cases, differing in the benefit and cost to the allelopathic plant. In  
370 the first, the non-allelopathic plant is a stronger competitor due to high metabolic costs to the  
371 allelopathic plant, and not producing allelochemicals is the evolutionarily stable strategy. In the  
372 second, the allelopathic plant is the better competitor and production of allelochemicals is the

373 more beneficial strategy. In the last case, the allelopathic and non-allelopathic plants are equal  
374 competitors, but pay different costs resulting in alternative stable states depending on the history  
375 of the system. We find that despite the obvious benefits of allelopathy, there are relatively few  
376 conditions that lead to  $+A$  as a pure ESS, and that if  $-A$  is the ancestral state the large regions  
377 dominated by priority effects would mean  $+A$  mutants cannot successfully spread in a population.  
378 We argue that these results potentially help explain the relative rarity of allelopathy in nature.  
379 Additionally, the four parameters give insight into molecular mechanisms that future biochemical  
380 and molecular work could seek to better understand. Further empirical exploration of this model  
381 could lead to useful agricultural tools.

382

### 383 **AUTHORS' CONTRIBUTIONS**

384 R.M.M. conceived the project with guidance from G.G.M. and J.R.W.; R.M.M. and G.G.M.  
385 performed the modeling; R.M.M., J.R.W., and G.G.M. analyzed the model solutions and wrote the  
386 paper.

387

### 388 **ACKNOWLEDGEMENTS**

389 This work was supported by the USDA National Institute of Food and Agriculture Predoctoral  
390 Grant 2018-67011-28032 to R.M.M. and start-up funds from Purdue University to G.G.M. and  
391 J.R.W. This work was also supported by the USDA National Institute of Food and Agriculture  
392 Hatch Projects number 1010722 to G.G.M. and number 177845 to J.R.W.

393

### 394 **COMPETING INTERESTS**

395 The authors declare no competing interests.

396

397



398

|        |      | Opponent          |               |
|--------|------|-------------------|---------------|
|        |      | $+A$              | $-A$          |
| Player | $+A$ | $\frac{B}{2} - C$ | $aB - C$      |
|        | $-A$ | $(1 - a)B - T$    | $\frac{B}{2}$ |

399

400 **FIGURE 1:** Symmetric pay-off matrix for competition between plants that either produce

401 allelochemicals ( $+A$ ) or not ( $-A$ ). See text for parameter definitions.

402

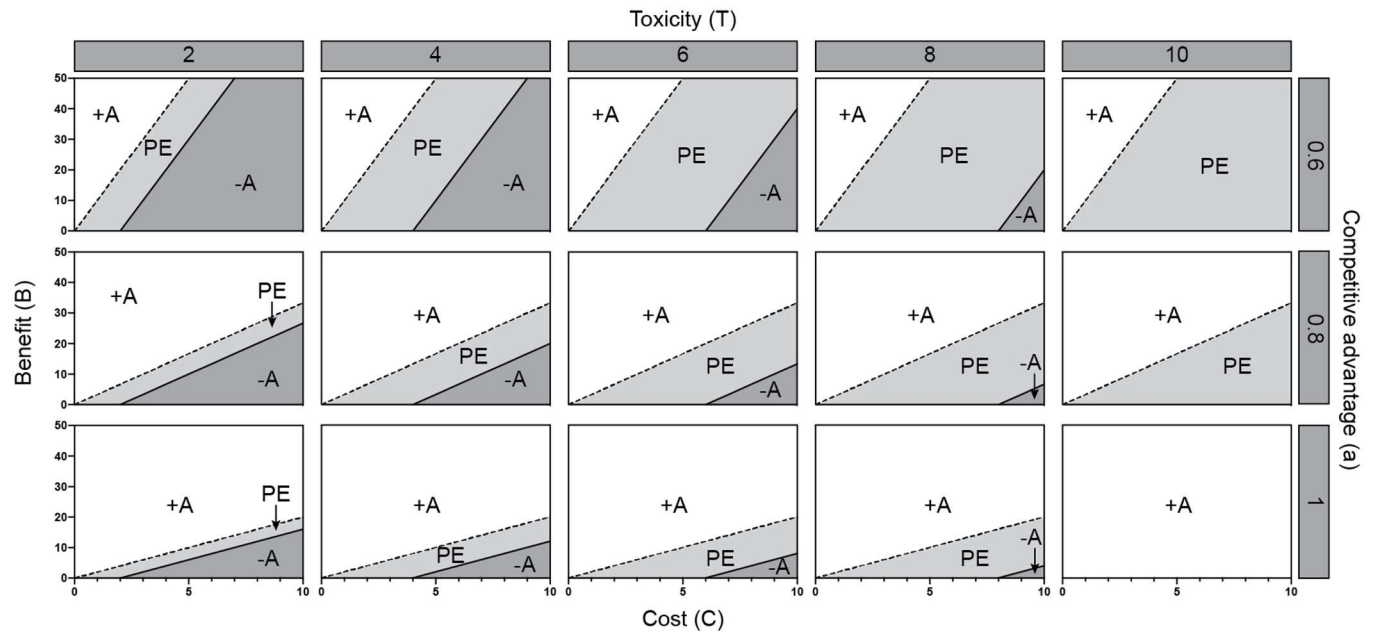

403

404 **FIGURE 2:** Isoclines that depict ESS states in B and C phase space depending on the value of T

405 (columns) or a (rows). The dashed line represents the isocline  $B = \frac{2C}{2a-1}$ . The solid line represents

406 the isocline  $B = \frac{2(C-T)}{2a-1}$ . White space is the area of parameter space where production of

407 allelochemicals (+A) is the ESS. Dark grey is where not producing allelochemicals is the ESS

408 (-A). The space in between (light grey) is where priority effect (PE) occurs.

409

410 **REFERENCES**

- 411 1. Schoener, T. W. Field Experiments on Interspecific Competition. *Am. Nat.* **122**, 240–285  
412 (1983).
- 413 2. Connell, J. H. On the Prevalence and Relative Importance of Interspecific Competition :  
414 Evidence from Field Experiments. *Am. Nat.* **122**, 661–696 (1983).
- 415 3. Fowler, N. The role of competition in studies of spatial pattern. *Annu. Rev. Ecol. Syst.* **17**,  
416 89–110 (1986).
- 417 4. Wilson, J. B. Shoot Competition and Root Competition. *J. Appl. Ecol.* **25**, 279–296  
418 (1988).
- 419 5. Friedman, J. The Effect of Competition by Adult *Zygophyllum Dumosum* Boiss. On  
420 Seedlings of *Artemisia Herba-Alba* Asso in the Negev Desert of Israel. *J. Ecol.* **59**, 775  
421 (1971).
- 422 6. Carothers, J. H. & Jaksić, F. M. Time as a Niche Difference: The Role of Interference  
423 Competition. *Oikos* **42**, 403–406 (1984).
- 424 7. Ford, H. A. Interspecific competition in Australian honeyeaters—depletion of common  
425 resources. *Aust. J. Ecol.* **4**, 145–164 (1979).
- 426 8. Fuerst, E. P. & Putnam, A. R. Separating the competitive and allelopathic components of  
427 interference - Theoretical principles. *J. Chem. Ecol.* **9**, 937–944 (1983).
- 428 9. Latif, S., Chiapusio, G. & Weston, L. A. *Allelopathy and the Role of Allelochemicals in*  
429 *Plant Defence. Advances in Botanical Research* vol. 82 (Elsevier Ltd, 2017).
- 430 10. Inderjit & Callaway, R. M. Experimental designs for the study of allelopathy. *Plant Soil*  
431 **256**, 1–11 (2003).
- 432 11. Lau, J. A. *et al.* Inference of allelopathy is complicated by effects of activated carbon on  
433 plant growth. *New Phytol.* **178**, 412–423 (2008).
- 434 12. Jose, S. & Gillespie, A. R. Allelopathy in black walnut (*Juglans nigra* L.) alley cropping. II.  
435 Effects of juglone on hydroponically grown corn (*Zea mays* L.) and soybean (*Glycine max*

- 436 L. Merr.) growth and physiology. *Plant Soil* **203**, 199–205 (1998).
- 437 13. Wilcove, D. S., Rothstein, D., Dubow, J., Phillips, A. & Losos, E. Quantifying Threats to  
438 Imperiled Species in the United States. *Bioscience* **48**, 607–615 (1998).
- 439 14. Callaway, R. M. & Aschehoug, E. T. Invasive Plants Versus Their New and Old  
440 Neighbors: A Mechanism for Exotic Invasion. *Science (80-. )*. **290**, 521–523 (2000).
- 441 15. Keane, R. M. & Crawley, M. J. Exotic plant invasions and the enemy release hypothesis.  
442 *Trends Ecol. Evol.* **17**, 164–170 (2002).
- 443 16. Zhu, X. *et al.* Identification and localization of bioactive naphthoquinones in the roots and  
444 rhizosphere of Paterson’s curse (*Echium plantagineum*), a noxious invader. *J. Exp. Bot.*  
445 **67**, 3777–3788 (2016).
- 446 17. Callaway, R. M. & Ridenour, W. M. Novel weapons: Invasive success and the evolution  
447 of increased competitive ability. *Front. Ecol. Environ.* **2**, 436–443 (2004).
- 448 18. Prati, D. & Bossdorf, O. Allelopathic inhibition of germination by *Alliaria petiolata*  
449 (*Brassicaceae*). *Am. J. Bot.* **91**, 285–288 (2004).
- 450 19. Ruckli, R., Hesse, K., Glauser, G., Rusterholz, H.-P. & Baur, B. Inhibitory potential of  
451 naphthoquinones leached from leaves and exuded from roots of the invasive plant  
452 *Impatiens glandulifera*. *J. Chem. Ecol.* **40**, 371–8 (2014).
- 453 20. Ruckli, R., Rusterholz, H. P. & Baur, B. Invasion of an annual exotic plant into deciduous  
454 forests suppresses arbuscular mycorrhiza symbiosis and reduces performance of  
455 sycamore maple saplings. *For. Ecol. Manage.* **318**, 285–293 (2014).
- 456 21. Gruntman, M., Pehl, A. K., Joshi, S. & Tielbörger, K. Competitive dominance of the  
457 invasive plant *Impatiens glandulifera*: Using competitive effect and response with a  
458 vigorous neighbour. *Biol. Invasions* **16**, 141–151 (2014).
- 459 22. Maynard Smith, J. & Price, G. R. The Logic of Animal Conflict. *Nature* **246**, 47–49 (1973).
- 460 23. Apaloo, J., Brown, J. S., McNickle, G. G., Vincent, T. L. S. & Vincent, T. L. ESS versus  
461 Nash: Solving evolutionary games. *Evol. Ecol. Res.* **16**, 293–314 (2014).

- 462 24. Maynard Smith, J. *Evolution and the Theory of Games*. (Cambridge University Press,  
463 1982).
- 464 25. Cipollini, D., Rigsby, C. M. & Barto, E. K. Microbes as Targets and Mediators of  
465 Allelopathy in Plants. *J. Chem. Ecol.* **38**, 714–727 (2012).
- 466 26. Schmidt, S. K. Degradation of juglone by soil bacteria. *J. Chem. Ecol.* **14**, 1561–1571  
467 (1988).
- 468 27. Heisey, R. M. Identification of an allelopathic compound from *Ailanthus altissima*  
469 (Simaroubaceae) and characterization of its herbicidal activity. *Am. J. Bot.* **83**, 192–200  
470 (1996).
- 471 28. Lakshmanan, V., Selvaraj, G. & Bais, H. P. Functional soil microbiome: Belowground  
472 solutions to an aboveground problem. *Plant Physiol.* **166**, 689–700 (2014).
- 473 29. Stinson, K. A. *et al.* Invasive plant suppresses the growth of native tree seedlings by  
474 disrupting belowground mutualisms. *PLoS Biol.* **4**, 727–731 (2006).
- 475 30. Mishra, S., Upadhyay, R. S. & Nautiyal, C. S. Unravelling the beneficial role of microbial  
476 contributors in reducing the allelopathic effects of weeds. *Appl. Microbiol. Biotechnol.* **97**,  
477 5659–5668 (2013).
- 478 31. Zeng, R. Sen & Mallik, A. U. Selected ectomycorrhizal fungi of black spruce (*Picea*  
479 *mariana*) can detoxify phenolic compounds of *Kalmia angustifolia*. *J. Chem. Ecol.* **32**,  
480 1473–1489 (2006).
- 481 32. Widhalm, J. R. & Rhodes, D. Biosynthesis and molecular actions of specialized 1,4-  
482 naphthoquinone natural products produced by horticultural plants. *Hortic. Res.* **3**, 16046  
483 (2016).
- 484 33. Meyer, G. W., Bahamon Naranjo, M. A. & Widhalm, J. R. Convergent evolution of plant  
485 specialized 1,4-naphthoquinones: metabolism, trafficking, and resistance to their  
486 allelopathic effects. *J. Exp. Bot.* 1–9 (2020) doi:10.1093/jxb/eraa462.
- 487 34. McCoy, R. M., Utturkar, S. M., Crook, J. W., Thimmapuram, J. & Widhalm, J. R. The

- 488 origin and biosynthesis of the naphthalenoid moiety of juglone in black walnut. *Hortic.*  
489 *Res.* **5**, 67 (2018).
- 490 35. Zenk, M. H. & Leistner, E. On the mode of incorporation of shikimic acid into 2-hydroxy-1,  
491 4-naphthoquinone (lawsone). *Zeitschrift fur Naturforsch. - Sect. B J. Chem. Sci.* **22**, 460  
492 (1967).
- 493 36. Hussain, H., Krohn, K., Ahmad, V. U., Miana, G. A. & Green, I. R. Lapachol: An overview.  
494 *Arkivoc* **2007**, 145 (2007).
- 495 37. Yamazaki, M. *et al.* Coupling deep transcriptome analysis with untargeted metabolic  
496 profiling in *opiorrhiza pumila* to further the understanding of the biosynthesis of the anti-  
497 cancer alkaloid camptothecin and anthraquinones. *Plant Cell Physiol.* **54**, 686–696  
498 (2013).
- 499 38. Furumoto, T. & Hoshikuma, A. Biosynthetic origin of 2-geranyl-1,4-naphthoquinone and  
500 its related anthraquinone in a *Sesamum indicum* hairy root culture. *Phytochemistry* **72**,  
501 871–4 (2011).
- 502 39. Dana, M. & Lerner, B. Black walnut toxicity. *Purdue Univ. Coop. Ext. Serv.* **HO-193-W**, 2  
503 (2001).
- 504 40. Block, A. K., Yakubova, E. & Widhalm, J. R. Specialized naphthoquinones present in  
505 *Impatiens glandulifera* nectaries inhibit the growth of fungal nectar microbes. *Plant Direct*  
506 **3**, e00132 (2019).
- 507 41. Gaines, T. A. *et al.* Mechanisms of evolved herbicide resistance. *J. Biol. Chem.* **295**,  
508 10307–10330 (2020).
- 509 42. Hatzios, K. K. Metabolism-based herbicide resistance : regulation by safeners. 454–467  
510 (2004).
- 511 43. Yuan, J. S., Tranel, P. J. & Stewart, C. N. Non-target-site herbicide resistance: a family  
512 business. *Trends Plant Sci.* **12**, 6–13 (2007).
- 513 44. Cummins, I., Dixon, D. P., Freitag-Pohl, S., Skipsey, M. & Edwards, R. Multiple roles for

- 514 plant glutathione transferases in xenobiotic detoxification. *Drug Metab. Rev.* **43**, 266–280  
515 (2011).
- 516 45. Sun, Y., Li, H. & Huang, J. R. Arabidopsis TT19 functions as a carrier to transport  
517 anthocyanin from the cytosol to tonoplasts. *Mol. Plant* **5**, 387–400 (2012).
- 518 46. Cummins, I. *et al.* Key role for a glutathione transferase in multiple-herbicide resistance in  
519 grass weeds. *Proc. Natl. Acad. Sci. U. S. A.* **110**, 5812–5817 (2013).
- 520 47. Le Roy, J., Huss, B., Creach, A., Hawkins, S. & Neutelings, G. Glycosylation is a major  
521 regulator of phenylpropanoid availability and biological activity in plants. *Front. Plant Sci.*  
522 **7**, 735 (2016).
- 523 48. Müller, W. U. & Leistner, E. Aglycones and glycosides of oxygenated naphthalenes and a  
524 glycosyltransferase from Juglans. *Phytochemistry* **17**, 1739–1742 (1978).
- 525 49. Conte, S. S. & Lloyd, A. M. Exploring multiple drug and herbicide resistance in plants-  
526 Spotlight on transporter proteins. *Plant Sci.* **180**, 196–203 (2011).
- 527 50. Pedras, M. S. C. & Ahiaonu, P. W. K. Metabolism and detoxification of phytoalexins and  
528 analogs by phytopathogenic fungi. *Phytochemistry* **66**, 391–411 (2005).
- 529 51. Yu, R.-Q., Kurt, Z., He, F. & Spain, J. C. Biodegradation of the Allelopathic Chemical  
530 Pterostilbene by a *Sphingobium* sp. Strain from the Peanut Rhizosphere. *Appl. Environ.*  
531 *Microbiol.* **85**, 1–12 (2019).
- 532 52. Rettenmaier, H., Kupas, U. & Lingens, F. Degradation of juglone by *Pseudomonas putida*  
533 J 1. *FEMS Microbiol. Lett.* **19**, 193–195 (1983).
- 534 53. Mohler, C. L. & Stoner, K. A. Guidelines for Intercropping. in *Crop Rotation on Organic*  
535 *Farms* (eds. Mohler, C. L. & Johnson, S. E.) 95–100 (NRAES, 2009).
- 536 54. Cheng, F. & Cheng, Z. Research Progress on the use of Plant Allelopathy in Agriculture  
537 and the Physiological and Ecological Mechanisms of Allelopathy. *Front. Plant Sci.* **6**,  
538 1020 (2015).
- 539 55. Iqbal, J., Cheema, Z. A. & An, M. Intercropping of field crops in cotton for the

- 540 management of purple nutsedge (*Cyperus rotundus* L.). *Plant Soil* **300**, 163–171 (2007).
- 541 56. Kniss, A. R. Long-term trends in the intensity and relative toxicity of herbicide use. *Nat.*  
542 *Commun.* **8**, 1–7 (2017).
- 543 57. Heap, I. The international survey of herbicide resistant weeds. (2020).
- 544 58. Dayan, F. E., Owens, D. K. & Duke, S. O. Rationale for a natural products approach to  
545 herbicide discovery. *Pest Manag. Sci.* **68**, 519–528 (2012).
- 546 59. Cantrell, C. L., Dayan, F. E. & Duke, S. O. Natural products as sources for new  
547 pesticides. *J. Nat. Prod.* **75**, 1231–1242 (2012).
- 548 60. Duke, S. O. Weeding with transgenes. *Trends Biotechnol.* **21**, 192–195 (2003).
- 549 61. Ninkovic, V., Glinwood, R. & Pettersson, J. Communication between undamaged plants  
550 by volatiles: the role of allelobiosis. in *Communication in Plants: Neuronal Aspects of*  
551 *Plant Life* 421–434 (2010). doi:10.1007/978-3-540-28516-8.
- 552 62. Farmer, E. E. & Ryan, C. A. Interplant communication: Airborne methyl jasmonate  
553 induces synthesis of proteinase inhibitors in plant leaves. *Proc. Natl. Acad. Sci. U. S. A.*  
554 **87**, 7713–7716 (1990).
- 555
- 556



557 **SUPPLEMENTARY INFORMATION**

558

559 The main text describes a four parameter matrix game of Allelopathy. This model includes two  
560 different features of the allelochemical: (i) how it increases fitness benefits to the allelopathic  
561 plant through increased competitive ability (the parameter  $a$ ), and; (ii) how it imposes costs on  
562 competitors through toxicity (the parameter  $T$ ). Here, we examine two additional three  
563 parameter models, one without  $a$ , and one without  $T$ , to further probe whether this two-feature  
564 way of describing allelochemicals was necessary.

565

566 **Exclusion of the parameter  $a$**

567 In the main text, the parameter  $a$  signifies the competitive advantage conveyed to allelopathic  
568 plants when competing for resources. Here, we examine a three-parameter model without the  
569 inclusion of the parameter  $a$  which we began with. The solution to this game showed us that this  
570 three parameter model was too simple, and we therefore developed the four parameter model  
571 described in the main text. In this version, we assume that competing plants share the benefit in  
572 a given area equally (*i.e.*  $\frac{B}{2}$ ). This yields the following pay-off matrix:

|        |      | Opponent          |                   |
|--------|------|-------------------|-------------------|
|        |      | $+A$              | $-A$              |
| Player | $+A$ | $\frac{B}{2} - C$ | $\frac{B}{2} - C$ |
|        | $-A$ | $\frac{B}{2} - T$ | $\frac{B}{2}$     |

573 *Supplementary Figure S1: Symmetric pay-off matrix for competition between plants that either*  
574 *produce allelochemicals ( $+A$ ) or not ( $-A$ ) without the inclusion of the competitive parameter  $a$*

575

576 In this case, for  $+A$  to be a pure ESS, (i)  $+A$  needs to be able to invade a population of  $-A$  and (ii)  
577 needs to resist invasion from  $-A$ . According to the ESS definition, this occurs when:

578 
$$\frac{B}{2} - C > \frac{B}{2} \text{ and } \frac{B}{2} - C > \frac{B}{2} - T \quad (\text{equations 9a})$$

579

580 Both of which can be rearranged to:

581 
$$-C > 0 \text{ and } T > C \quad (\text{equations 9b})$$

582

583 Therefore,  $+A$  can never be the ESS in this simpler three parameter version of the game because  
584  $C$  is by definition greater than zero, so the first condition in equations 9b cannot be met.

585

586 Conversely, for  $-A$  to be a pure ESS, (i)  $-A$  needs to be able to invade a population of  $+A$  and (ii)  
587 needs to resist invasion from  $+A$ . According to the ESS definition, this occurs when:

588 
$$\frac{B}{2} - C < \frac{B}{2} \text{ and } \frac{B}{2} - C < \frac{B}{2} - T \quad (\text{equations 10a})$$

589

590 Both of which can be rearranged to:

591 
$$-C < 0 \text{ and } T < C \quad (\text{equations 10b})$$

592

593 In this case,  $B$  has no bearing on the ESS. The only factors that matter are the relative values of  
594  $C$  and  $T$ . Also, allelopathy can never be the ESS, which seems counterintuitive, and incorrect  
595 since we find allelopathic plants in nature. Thus, it seems clear that if the only thing an  
596 allelochemical does is impose a fitness cost on competitors, this is not sufficient for allelopathy  
597 to evolve.

598

599 **Exclusion of the parameter  $T$**

600 In the main text the parameter  $T$  signifies the toxicity of the allelochemical. Here, we examine a  
 601 simpler three-parameter model without the inclusion of the parameter  $T$ , the pay-off matrix is as  
 602 follows:

|        |      | Opponent          |               |
|--------|------|-------------------|---------------|
|        |      | $+A$              | $-A$          |
| Player | $+A$ | $\frac{B}{2} - C$ | $aB - C$      |
|        | $-A$ | $(1 - a)B$        | $\frac{B}{2}$ |

603 *Supplementary Figure S2: Symmetric pay-off matrix for competition between plants that either*  
 604 *produce allelochemicals ( $+A$ ) or not ( $-A$ ) without the inclusion of  $T$ .*

605  
 606 In this case, for  $+A$  to be a pure ESS, (i)  $+A$  needs to be able to invade a population of  $-A$  and (ii)  
 607 needs to resist invasion from  $-A$ . According to the ESS definition, this occurs when:

608 
$$aB - C > \frac{B}{2} \text{ and } \frac{B}{2} - C > B(1 - a) \quad (\text{equations 11a})$$

609  
 610 Both of which can be rearranged to:

611 
$$B > \frac{2C}{2a-1} \quad (\text{equation 11b})$$

612  
 613 Conversely, for  $-A$  to be a pure ESS, (i)  $-A$  needs to be able to invade a population of  $+A$  and (ii)  
 614 needs to resist invasion from  $+A$ . According to the ESS definition, this occurs when:

615 
$$aB - C < \frac{B}{2} \text{ and } \frac{B}{2} - C < B(1 - a) \quad (\text{equations 12a})$$

616  
 617 Both of which can be rearranged to:

618 
$$B < \frac{2C}{2a-1} \quad (\text{equation 12b})$$

619

620 Because there is only a single isocline (equations 13b and 14b), mixed ESS are not possible. In

621 this situation, only pure ESS solutions can exist. Above the isocline  $B = \frac{2C}{2a-1}$ , +A is ESS and

622 below -A is ESS (Supplementary figure S3).

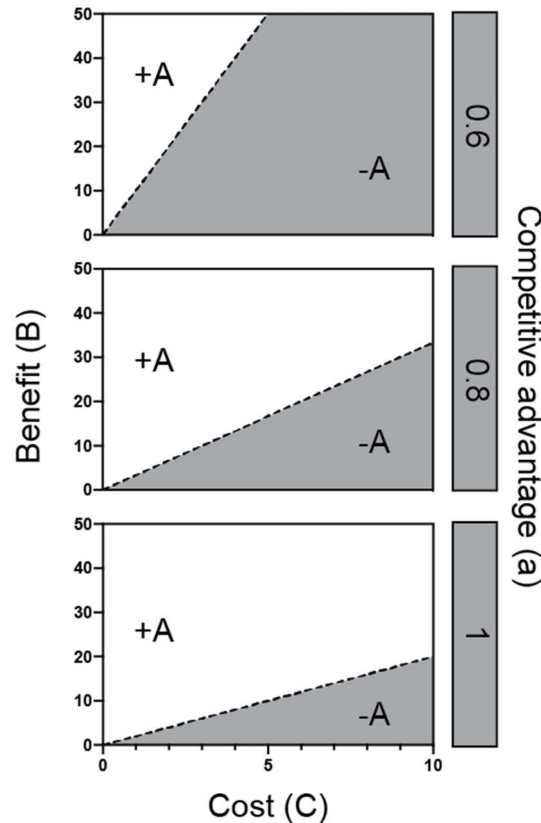

623

624 *Supplementary Figure S3: Isoclines that depict ESS states in B and C phase space depending*

625 *on the value  $a$  (rows). The dashed line represents the isocline  $B = \frac{2C}{2a-1}$ . White space is the area*

626 *of parameter space where production of allelochemicals (+A) is the ESS. Dark grey is where not*

627 *producing allelochemicals is the ESS (-A).*

628

629 Interestingly, a model that only includes a fitness benefit to the focal plant that emerges from

630 alleopathy could be a useful model of allopathy. It lacks the priority effects predicted by the

631 four parameter model in the main text (Fig 2), which presents a testable hypothesis. However,

632 given that the main biological feature of alleopathy is the toxicity that they cause to neighbours,  
633 we opted to include  $T$  in the model described in the main text, even though this model shows  
634 that this toxicity is not strictly necessary.
